# Supplementary material for: Hybrid mRMR and multi-objective particle swarm feature selection methods and application to metabolomics of traditional Chinese medicine
Source: PeerJ Comput Sci. 2024 May 31;10:e2073. doi: 10.7717/peerj-cs.2073 (PMC11157565; doi:10.7717/peerj-cs.2073)
Supplement: Supplemental Information 3 [file peerj-cs-10-2073-s003.docx]

**Title：Hybrid mRMR and multi-objective particle swarm feature selection methods and application to metabolomics of traditional Chinese medicine**

Mengting Zhang1, Jianqiang Du1,2,*,Bin Nie1,2 Jigen Luo1,2,Ming Liu1,Yang Yuan1

1School of Computer Science, Jiangxi University of Traditional Chinese Medicine, 330004 Nanchang, Jiangxi, China

2Key Laboratory of Artificial Intelligence in Chinese Medicine, Jiangxi University of Traditional Chinese Medicine, 330004 Nanchang, Jiangxi, China

*Correspondence: jianqiang_du@163.com (Jianqiang Du)

***Supplementary Tables***

**Table S1：p-values obtained from hypothesis testing between MCMOPSO and the two comparison algorithms in the metabolomics dataset**

| DataSet | NSGAII-MCMOPSO | MOPSO-MCMOPSO |
| --- | --- | --- |
| Endo-y1 | 0.2607 | **0.0094** |
| Endo-y2 | 0.3361 | **0.0060** |
| Endo-y3 | **0.0001** | **0.0004** |
| Endo-y4 | 0.1254 | 0.1578 |
| Exo-y1 | **0.0186** | 0.6720 |
| Exo-y2 | **0.0030** | 0.096 |
| Exo-y3 | **0.0001** | **0.0005** |
| Exo-y4 | **0.0001** | 0.0671 |

The first column of the table represents the 8 datasets of metabolomics, and the second column is the p-value obtained from hypothesis testing of the results of NSGA-II and MCMOPSO groups, which is denoted as p1 in the article, and similarly the p-value obtained from MOPSO-MCMOPSO is denoted as p2.

**Table S2：p-values obtained from hypothesis testing between MCMOPSO and the two comparison algorithms in the UCI dataset**

| DataSet | NSGAII-MCMOPSO | MOPSO-MCMOPSO |
| --- | --- | --- |
| BlogTe1 | **0.0133** | 0.1630 |
| BlogTe2 | 0.1049 | 0.2216 |
| BlogTe3 | **0.0478** | 0.1758 |
| BlogTe4 | **3.04E-06** | 0.3627 |
| BlogTe5 | 0.4569 | 0.5021 |
| BlogTe6 | 0.2601 | 0.1935 |
| BlogTe7 | **8.46E-09** | **0.0001** |
| BlogTe8 | **1.21E-07** | **0.0212** |
| BlogTe9 | 0.6771 | **0.0171** |
| BlogTe10 | **0.0116** | **0.0310** |

The first column of the table represents the 10 datasets of UCI, and the second column is the p-value obtained from hypothesis testing of the results of NSGA-II and MCMOPSO groups, which is denoted as p1 in the article, and similarly the p-value obtained from MOPSO-MCMOPSO is denoted as p2.

**Table S3：Comparison of R-square and MAE Results for One-Stage mRMR Algorithm and Other Comparative Algorithms on Metabolomic Dataset**

|  | **R^2** | | | | | **MAE** | | | | | |
| --- | --- | --- | --- | --- | --- | --- | --- | --- | --- | --- | --- |
| **DataSet** | **fu11_set** | **mRMR** | **MIC** | **Pearson** | **Spearman** | **fu11_set** | **mRMR** | **MIC** | **Pearson** | **Spearman** |
| Endo-y1 | -0.1181 | **0.5809** | 0.0090 | 0.1137 | 0.1023 | 559.7119 | **348.1721** | 507.0500 | 458.5555 | 486.7036 |
| Endo-y2 | -0.3651 | **0.6704** | -0.0630 | -0.1557 | 0.0873 | 22.1788 | **11.4727** | 19.8968 | 19.4281 | 18.0039 |
| Endo-y3 | 0.2532 | **0.6611** | 0.3121 | 0.3454 | 0.2746 | 4.0441 | **2.8775** | 4.0487 | 3.8494 | 4.0393 |
| Endo-y4 | 0.0821 | **0.5009** | 0.3033 | 0.3806 | 0.3255 | 8.9873 | **6.5481** | 7.8969 | 7.3776 | 8.0534 |
| Exo-y1 | 0.6191 | 0.8190 | 0.8029 | **0.8421** | 0.7733 | 276.3393 | 165.0824 | 183.9974 | **153.6420** | 195.6676 |
| Exo-y2 | -1.3923 | -1.4036 | **0.9698** | -1.39233 | -0.5633 | 12.8306 | 12.8538 | **12.5400** | 12.83057 | 11.9899 |
| Exo-y3 | 0.6039 | **0.7501** | 0.5938 | 0.6039 | 0.6039 | 2.8719 | **2.0937** | 2.8899 | 2.8719 | 2.8719 |
| Exo-y4 | -0.3201 | **0.0700** | -0.1176 | -0.3201 | -0.3201 | 3.0504 | **2.6716** | 2.7611 | 3.0504 | 3.0504 |

The first row is the two evaluation metrics are: r-squared and MAE. The table shows the r-squared sum MAEs of the output features of mRMR and the three comparison algorithms for the eight datasets of metabolomics, compared with the r-squared sum MAEs of the full set. Among them, the numbers marked in red are the ones with the best results.

**Table S4：Comparison of R-square and MAE Results for One-Stage mRMR Algorithm and Other Comparative Algorithms on UCI Dataset**

|  | | **R^2** | | | | | **MAE** | | | | | |
| --- | --- | --- | --- | --- | --- | --- | --- | --- | --- | --- | --- | --- |
| **DataSet** | **fu11_set** | | **mRMR** | **MIC** | **Pearson** | **Spearman** | **fu11_set** | **mRMR** | **MIC** | **Pearson** | **Spearman** |
| BlogTe1 | 0.1743 | | 0.3311 | **0.5626** | 0.4663 | 0.4187 | 10.9571 | 9.3398 | **8.2193** | 9.7748 | 9.9025 |
| BlogTe2 | 0.1915 | | 0.4273 | 0.4861 | 0.3180 | **0.5012** | 9.0325 | 7.1527 | 7.0898 | 7.3920 | **6.5557** |
| BlogTe3 | -4.0984 | | 0.2845 | 0.2299 | 0.3042 | **0.3497** | 20.0693 | 10.9354 | 10.6507 | 10.5102 | **9.6664** |
| BlogTe4 | -5.0274 | | -0.6102 | -0.4118 | **-0.3167** | -0.6484 | 7.0723 | 5.6802 | 5.3362 | **4.8346** | 5.3698 |
| BlogTe5 | 0.5166 | | 0.8182 | 0.7995 | 0.7701 | **0.8547** | 8.9576 | 6.7633 | 6.4929 | 6.1980 | **6.0405** |
| BlogTe6 | 0.4385 | | 0.5128 | 0.5787 | **0.6532** | 0.4535 | 6.7065 | **4.8972** | 5.6182 | 5.1607 | 6.7184 |
| BlogTe7 | 0.14072 | | 0.1407 | 0.3300 | **0.3546** | 0.3171 | 4.9435 | 4.9435 | 4.9180 | **4.1255** | 4.6857 |
| BlogTe8 | -0.9002 | | -0.1731 | **0.0204** | -0.1871 | -0.9002 | 18.2467 | 15.9966 | **11.9452** | 15.7116 | 18.2467 |
| BlogTe9 | -0.1756 | | -0.0559 | -0.0637 | -0.0154 | **-0.0095** | 11.4928 | 11.0438 | **9.4501** | 11.2066 | 10.7230 |
| BlogTe10 | 0.3050 | | 0.5002 | 0.4011 | **0.5100** | 0.3252 | 8.8399 | 7.0032 | **6.3393** | 6.8869 | 8.9682 |

The first row is the two evaluation metrics are: r-squared and MAE. The table shows the r-squared sum MAEs of the output features of mRMR and the three comparison algorithms for the 10 datasets of UCI, compared with the r-squared sum MAEs of the full set. Among them, the numbers marked in red are the ones with the best results.

**Table S5：Comparison of R-square and MAE results between the MCMOPSO algorithm and other comparative algorithms on the metabolomic dataset in Phase 2**

|  | | **R^2** | | | **MAE** | | | |
| --- | --- | --- | --- | --- | --- | --- | --- | --- |
| **DataSet** | **MCMOPSO** | | **NSGA-II** | **MOPSO** | | **MCMOPSO** | **NSGA-II** | **MOPSO** |
| Endo-y1 | **0.7257** | | 0.714922 | 0.716857 | | **288.6019427** | 291.4226 | 290.3135 |
| Endo-y2 | **0.743982635** | | 0.737276 | 0.732571 | | 10.02967893 | 10.20625 | **10.1666** |
| Endo-y3 | **0.761185007** | | 0.748264 | 0.742535 | | **2.289880421** | 2.37478 | 2.391651 |
| Endo-y4 | **0.686941321** | | 0.672126 | 0.671605 | | **4.982693102** | 5.051008 | 5.085118 |
| Exo-y1 | 0.921918788 | | 0.9223 | **0.9234** | | 120.8093657 | 119.2378 | **118.3406** |
| Exo-y2 | **0.184870022** | | 0.178639 | 0.148984 | | **8.712371574** | 8.741666 | 8.887751 |
| Exo-y3 | **0.850819928** | | 0.827812 | 0.830245 | | **1.624974466** | 1.718673 | 1.714707 |
| Exo-y4 | **0.409965919** | | 0.36348 | 0.401481 | | 1.967763295 | 2.014016 | **1.953653** |

The table shows the comparison of the R-squared and MAE results obtained by MCMOPSO in the second stage with the NSGA-II algorithm and the MOPSO algorithm. Therein, the first row shows the two evaluation metrics: the R-squared and the MAE. the first column shows the 8 datasets of metabolomics and the other columns show the values of the algorithm names corresponding to the corresponding metrics.

**Table S6：Comparison of R-square and MAE results between the MCMOPSO algorithm and other comparative algorithms on the UCI dataset in Phase 2**

|  | **R^2** | | | | **MAE** | | | |
| --- | --- | --- | --- | --- | --- | --- | --- | --- |
| **DataSet** | | **MCMOPSO** | **NSGA-II** | **MOPSO** | **MCMOPSO** | **NSGA-II** | **MOPSO** |
| BlogTe1 | | **0.900973004** | 0.745143 | 0.813862 | **6.47120136** | 6.770505 | 7.062665 |
| BlogTe2 | | **0.854360895** | 0.684603 | 0.821888 | **4.024588155** | 5.197601 | 4.412731 |
| BlogTe3 | | **0.907383645** | 0.822369 | 0.036518 | **4.837829258** | 5.68264 | 10.22531 |
| BlogTe4 | | 0.086449649 | 0.106412 | **0.092157** | **3.952645802** | 4.002014 | 4.039169 |
| BlogTe5 | | **0.924442034** | 0.922997 | 0.914008 | **3.563438086** | 3.91938 | 3.837502 |
| BlogTe6 | | 0.901406057 | **0.908121** | 0.89058 | 3.61825215 | **3.561007** | 3.682778 |
| BlogTe7 | | 0.415784051 | **0.534503** | 0.468942 | 4.597324403 | **4.073159** | 4.470072 |
| BlogTe8 | | 0.221172612 | **0.293554** | 0.269415 | 13.70682168 | **11.29582** | 13.51557 |
| BlogTe9 | | 0.57207714 | 0.557503 | **0.576487** | **8.391738745** | 8.507358 | 8.423208 |
| BlogTe10 | | **0.815493745** | 0.804504 | 0.812436 | 5.112049815 | **5.104849** | 5.150851 |

The table shows the comparison of the R-squared and MAE results obtained by MCMOPSO in the second stage with the NSGA-II algorithm and the MOPSO algorithm. Therein, the first row shows the two evaluation metrics: the R-squared and the MAE. the first column shows the 10 datasets of UCI and the other columns show the values of the algorithm names corresponding to the corresponding metrics.
